# Supplementary material for: Health-related quality of life in adults with metabolic syndrome: a multi-level analysis of family and individual level variation
Source: PubMed Central journal article supplement — BMJ Open. 2024 Nov 18;14(11):e087870. doi: 10.1136/bmjopen-2024-087870 (PMC11574470; doi:10.1136/bmjopen-2024-087870), 2024-11-18
Supplement: bmjopen-14-11-s001.pdf [file bmjopen-14-11-s001.pdf]

**Supplementary Table 1.** Characteristics of study participants according to sex

| Variables                             | Men (n=2795)  | Women (n=3318) | P-value          |
|---------------------------------------|---------------|----------------|------------------|
| Age, year                             | 44.83 (14.8)  | 45.24 (13.2)   | 0.256            |
| <b>Education level</b>                |               |                | <b>&lt;0.001</b> |
| Primary                               | 126 (4.5)     | 321(9.7)       |                  |
| Secondary                             | 1365 (48.8)   | 1568 (47.3)    |                  |
| Higher                                | 13.4 (46.7)   | 1429 (43.1)    |                  |
| <b>Employment</b>                     |               |                | <b>&lt;0.001</b> |
| Unemployed                            | 704 (25.2)    | 2523 (76.0)    |                  |
| Employed                              | 2091(74.8)    | 795 (24.0)     |                  |
| <b>Marital status</b>                 |               |                | 0.262            |
| Unmarried                             | 760 (27.2)    | 860 (25.9)     |                  |
| Married                               | 2035(72.8)    | 2485 (74.1)    |                  |
| <b>Smoking status</b>                 |               |                | <b>&lt;0.001</b> |
| Yes                                   | 631(22.6)     | 92 (2.8)       |                  |
| No                                    | 2164 (77.4)   | 3226 (97.2)    |                  |
| <b>Leisure-time physical activity</b> | 926.01(542.8) | 683.23 (463.4) | <b>&lt;0.001</b> |
| <b>CKD</b>                            |               |                | <b>&lt;0.001</b> |
| Yes                                   | 427 (15.3)    | 960 (28.9)     |                  |
| No                                    | 2368 (84.7)   | 2358 (71.1)    |                  |
| <b>History of CVD</b>                 |               |                | <b>0.025</b>     |
| Yes                                   | 396 (14.2)    | 539 (16.2)     |                  |
| No                                    | 239 9 (85.8)  | 2779 (83.8)    |                  |
| <b>History of cancer</b>              |               |                | 0.054            |
| Yes                                   | 7 (0.3)       | 19 (0.6)       |                  |
| No                                    | 2788 (99.7)   | 3299 (99.4)    |                  |
| <b>SBP, mmHg</b>                      | 115.64(13.9)  | 107.35 (14.3)  | <b>&lt;0.001</b> |
| <b>DBP, mmHg</b>                      | 75.62 (13.0)  | 72.14 (9.31)   | <b>&lt;0.001</b> |
| <b>WC, cm</b>                         | 95.66 (11.1)  | 91.40 (11.5)   | <b>&lt;0.001</b> |
| <b>FBS, mg/dL</b>                     | 93.90 (9.1)   | 91.88 (8.87)   | <b>&lt;0.001</b> |
| <b>TG, mg/dL</b>                      | 153.32 (95.1) | 124.26 (69.1)  | <b>&lt;0.001</b> |
| <b>HDL, mg/dL</b>                     | 43.00 (9.8)   | 50.99 (10.8)   | <b>&lt;0.001</b> |
| <b>MetS</b>                           |               |                | <b>&lt;0.001</b> |
| Yes                                   | 1459 (52.2)   | 975 (29.4)     |                  |
| No                                    | 1336 (47.8)   | 2343 (70.6)    |                  |

Categorical and continuous variables are expressed as mean (SD) and number (%), respectively. The P-value was assessed using Chi-square tests for categorical variables and the T-test for continuous variables. Abbreviations: Chronic kidney disease (CKD); cardiovascular disease (CVD); systolic blood pressure (SBP); Diastolic blood pressure (DBP); waist circumference (WC); fasting blood sugar (FBS); triglyceride (TG), high-density lipoprotein (HDL); metabolic syndrome (MetS).

**Supplementary Table 2.** The association between participants' characteristics with the physical and mental component summary of HRQoL according to sex

|                                       | Men (n=2795)               |                  |                          |                  | Women (n=3318)             |                  |                          |                  |
|---------------------------------------|----------------------------|------------------|--------------------------|------------------|----------------------------|------------------|--------------------------|------------------|
|                                       | Physical component summary |                  | Mental component summary |                  | Physical component summary |                  | Mental component summary |                  |
|                                       | $\beta$                    | P-value          | $\beta$                  | P-value          | $\beta$                    | P-value          | $\beta$                  | P-value          |
| <b>Intercept</b>                      | <b>50.013</b>              | <b>&lt;0.001</b> | <b>44.182</b>            | <b>&lt;0.001</b> | <b>47.011</b>              | <b>&lt;0.001</b> | <b>40.189</b>            | <b>&lt;0.001</b> |
| <b>Age</b>                            | <b>-0.089</b>              | <b>&lt;0.001</b> | 0.033                    | 0.076            | <b>-0.182</b>              | <b>&lt;0.001</b> | 0.006                    | 0.7291           |
| <b>Education Level</b>                |                            |                  |                          |                  |                            |                  |                          |                  |
| Primary                               | Ref                        | Ref              | Ref                      | Ref              | Ref                        | Ref              | Ref                      | Ref              |
| Secondary                             | 0.326                      | 0.589            | 0.237                    | 0.8043           | <b>1.711</b>               | <b>0.001</b>     | 0.900                    | 0.1994           |
| Higher                                | 1.413                      | 0.022            | 1.295                    | 0.189            | <b>2.494</b>               | <b>&lt;0.001</b> | 1.464                    | 0.0636           |
| <b>Smoking status</b>                 |                            |                  |                          |                  |                            |                  |                          |                  |
| No                                    | Ref                        | Ref              | Ref                      | Ref              | Ref                        | Ref              | Ref                      | Ref              |
| Yes                                   | 0.022                      | 0.935            | <b>-3.271</b>            | <b>&lt;0.001</b> | -1.164                     | 0.160            | <b>-5.675</b>            | <b>&lt;0.001</b> |
| <b>Leisure-time physical activity</b> | <b>0.989</b>               | <b>&lt;0.001</b> | <b>0.329</b>             | <b>0.039</b>     | <b>1.157</b>               | <b>&lt;0.001</b> | <b>1.174</b>             | <b>&lt;0.001</b> |
| <b>Employment</b>                     |                            |                  |                          |                  |                            |                  |                          |                  |
| Employed                              | Ref                        | Ref              | Ref                      | Ref              | Ref                        | Ref              | Ref                      | Ref              |
| Unemployed                            | <b>-1.088</b>              | <b>&lt;0.001</b> | 0.799                    | 0.094            | -0.669                     | 0.061            | -0.049                   | 0.9179           |
| <b>Marital status</b>                 |                            |                  |                          |                  |                            |                  |                          |                  |
| Married                               | Ref                        | Ref              | Ref                      | Ref              | Ref                        | Ref              | Ref                      | Ref              |
| Unmarried                             | -0.288                     | 0.400            | <b>-1.293</b>            | <b>0.017</b>     | <b>0.856</b>               | <b>0.0083</b>    | -0.660                   | 0.1266           |
| <b>CKD</b>                            |                            |                  |                          |                  |                            |                  |                          |                  |
| No                                    | Ref                        | Ref              | Ref                      | Ref              | Ref                        | Ref              | Ref                      | Ref              |
| Yes                                   | -0.292                     | 0.409            | 0.595                    | 0.290            | 0.172                      | 0.605            | 0.537                    | 0.2283           |
| <b>History of CVD</b>                 |                            |                  |                          |                  |                            |                  |                          |                  |
| No                                    | Ref                        | Ref              | Ref                      | Ref              | Ref                        | Ref              | Ref                      | Ref              |
| Yes                                   | <b>-1.878</b>              | <b>&lt;0.001</b> | -1.024                   | 0.062            | <b>-2.253</b>              | <b>&lt;0.001</b> | <b>-1.094</b>            | <b>0.0282</b>    |
| <b>History of Cancer</b>              |                            |                  |                          |                  |                            |                  |                          |                  |
| No                                    | Ref                        | Ref              | Ref                      | Ref              | Ref                        | Ref              | Ref                      | Ref              |
| Yes                                   | -0.073                     | 0.975            | -2.414                   | 0.516            | -3.001                     | 0.094            | -0.781                   | 0.7443           |
| <b>MetS</b>                           |                            |                  |                          |                  |                            |                  |                          |                  |
| No                                    | Ref                        | Ref              | Ref                      | Ref              | Ref                        | Ref              | Ref                      | Ref              |
| Yes                                   | -0.386                     | 0.120            | -0.073                   | 0.8518           | <b>-1.476</b>              | <b>&lt;0.001</b> | <b>-1.058</b>            | <b>0.0434</b>    |

Models are adjusted for age, occupation, education, marital status, smoking, leisure-time physical activity, history of CVD, CKD, and history of cancer. Abbreviations: Chronic kidney disease (CKD); cardiovascular disease (CVD). For categorical variables,  $\beta$  represents the increase in the average response for each category compared to the reference category by adjusting other variables.  $\beta$  for continuous variables represents the increase in mean response per unit increase in each independent variable after adjusting for the effects of other variables.
